# Supplementary material for: Total Synthesis of Resvebassianol A, a Metabolite of Resveratrol by Beauveria bassiana
Source: MDPI journal article supplement (doi:10.3390/antiox10101509), 2021-09-23

## Supporting Information

# Total Synthesis of Resvebassianol A, a Metabolite of Resveratrol by *Beauveria bassiana*

Om Darlami and Dongyun Shin \*

College of Pharmacy, Gachon Univeristy, 191. Hambakmoe-ro, Yeonsu-gu, Incheon 21936,  
Korea

\*Correspondence: dyshin@gachon.ac.kr;

### Contents:

<sup>1</sup>H and <sup>13</sup>C-NMR spectra of the compounds,

# <sup>1</sup>H-NMR (600MHz, CDCl<sub>3</sub>) of compound 13

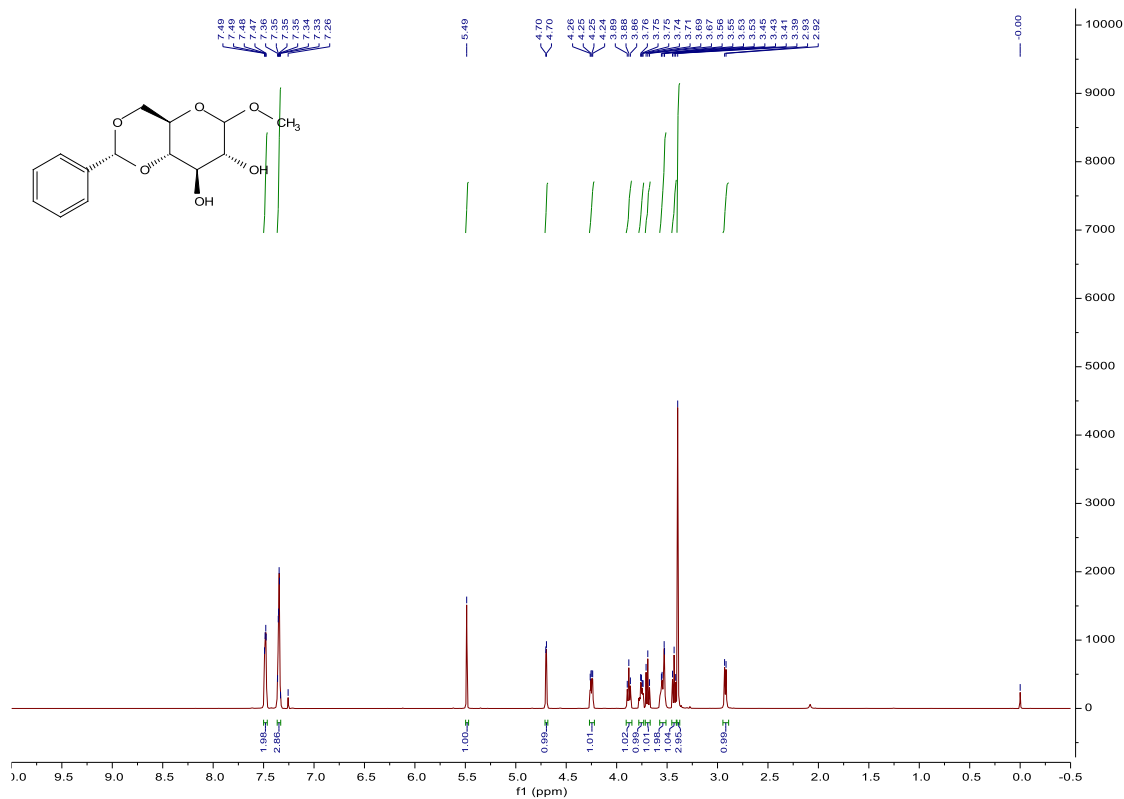

# <sup>13</sup>C-NMR (150MHz, CDCl<sub>3</sub>) of compound 13

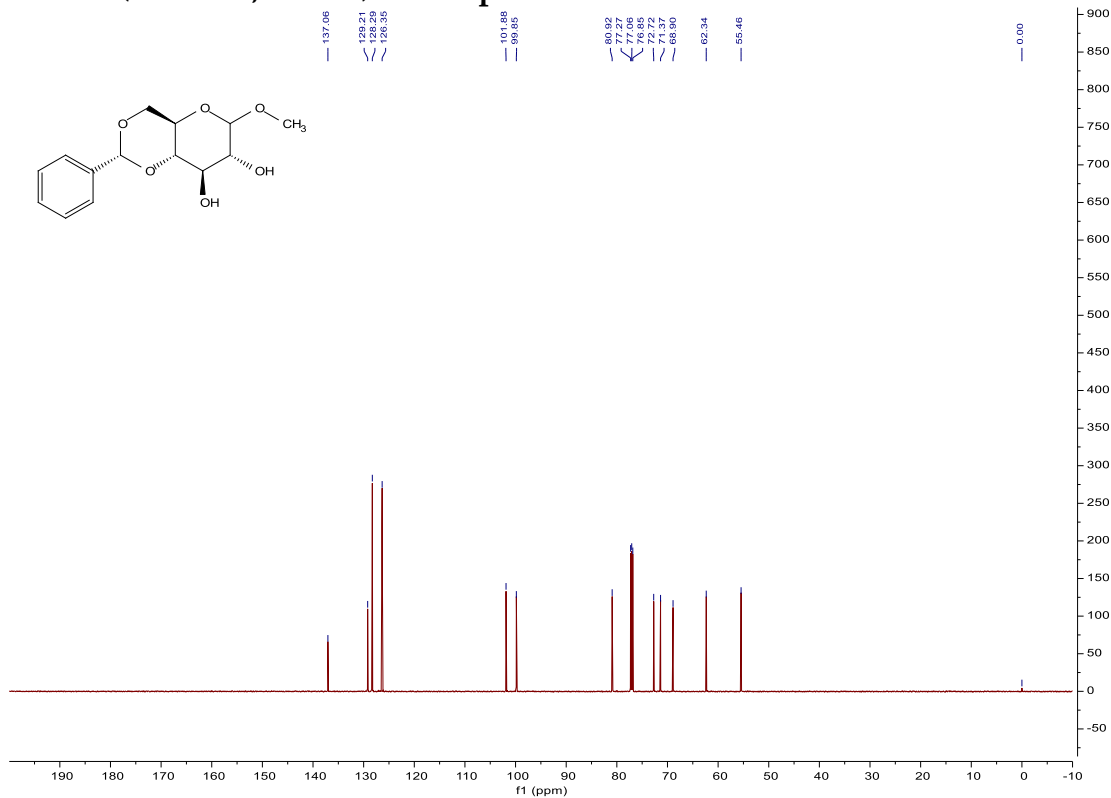

**$^1\text{H}$ -NMR (600MHz,  $\text{CDCl}_3$ ) of compound 14**

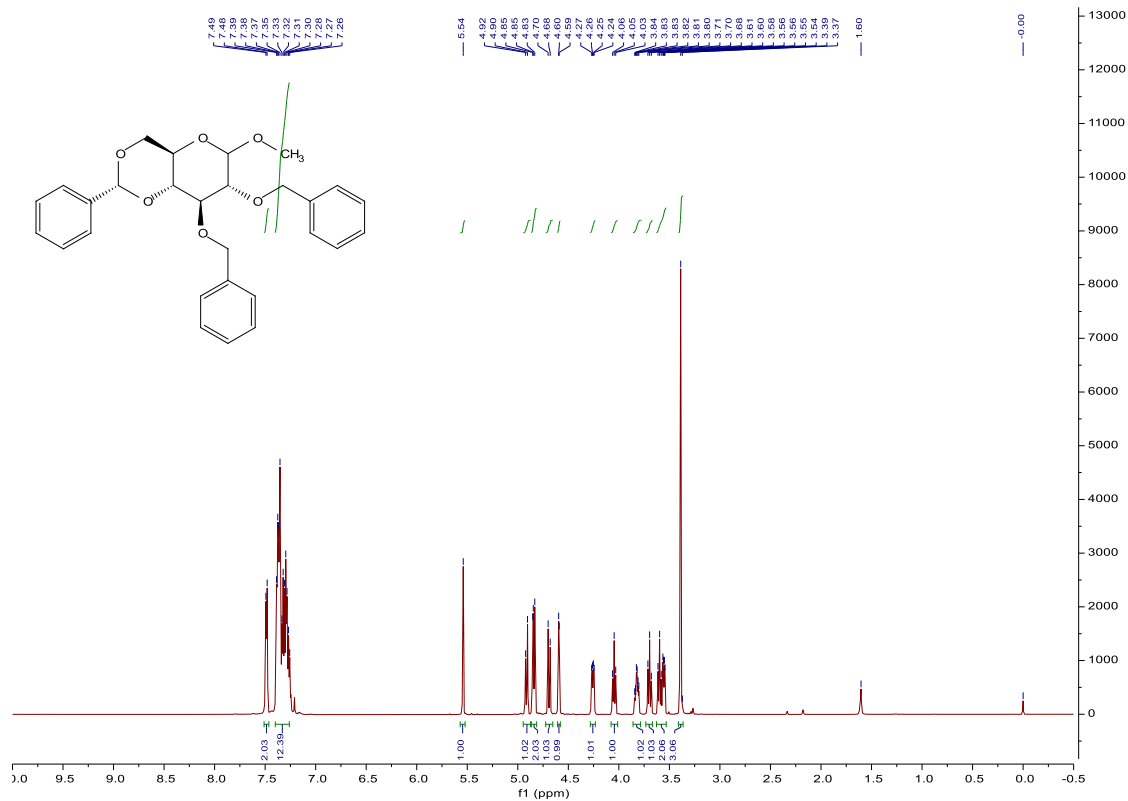

**$^{13}\text{C}$ -NMR (150 MHz,  $\text{CDCl}_3$ ) of compound 14**

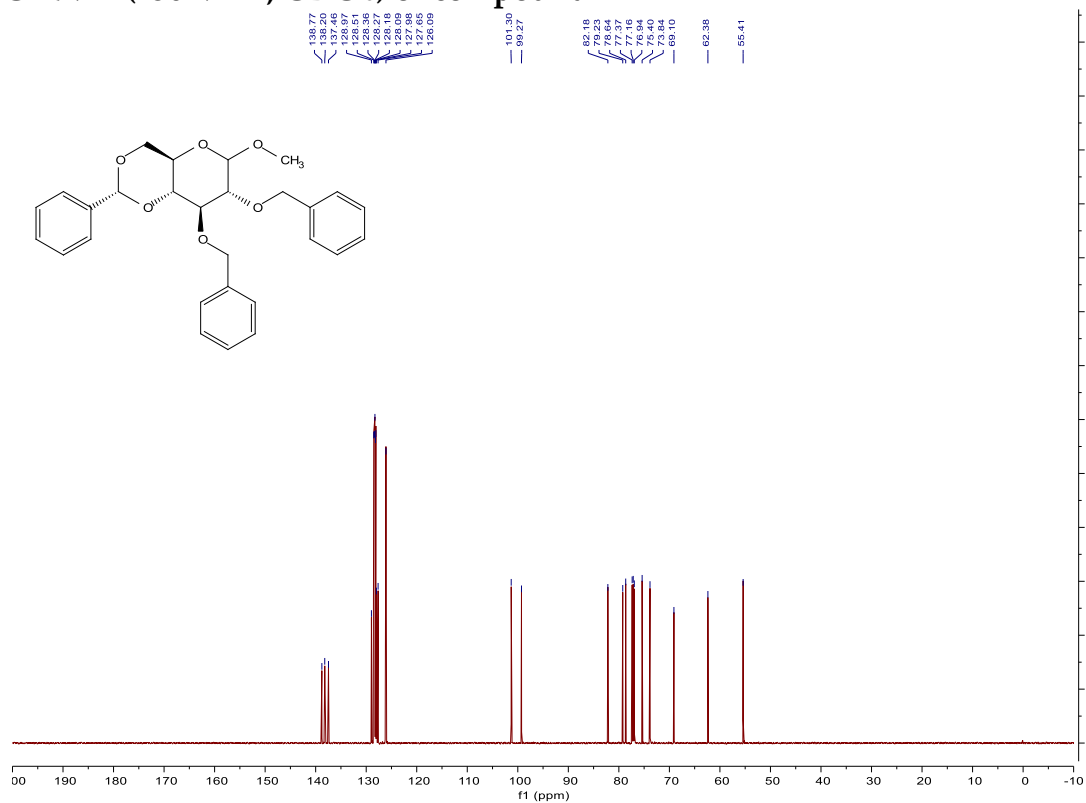

**$^1\text{H-NMR}$  (600MHz,  $\text{CDCl}_3$ ) of compound 15**

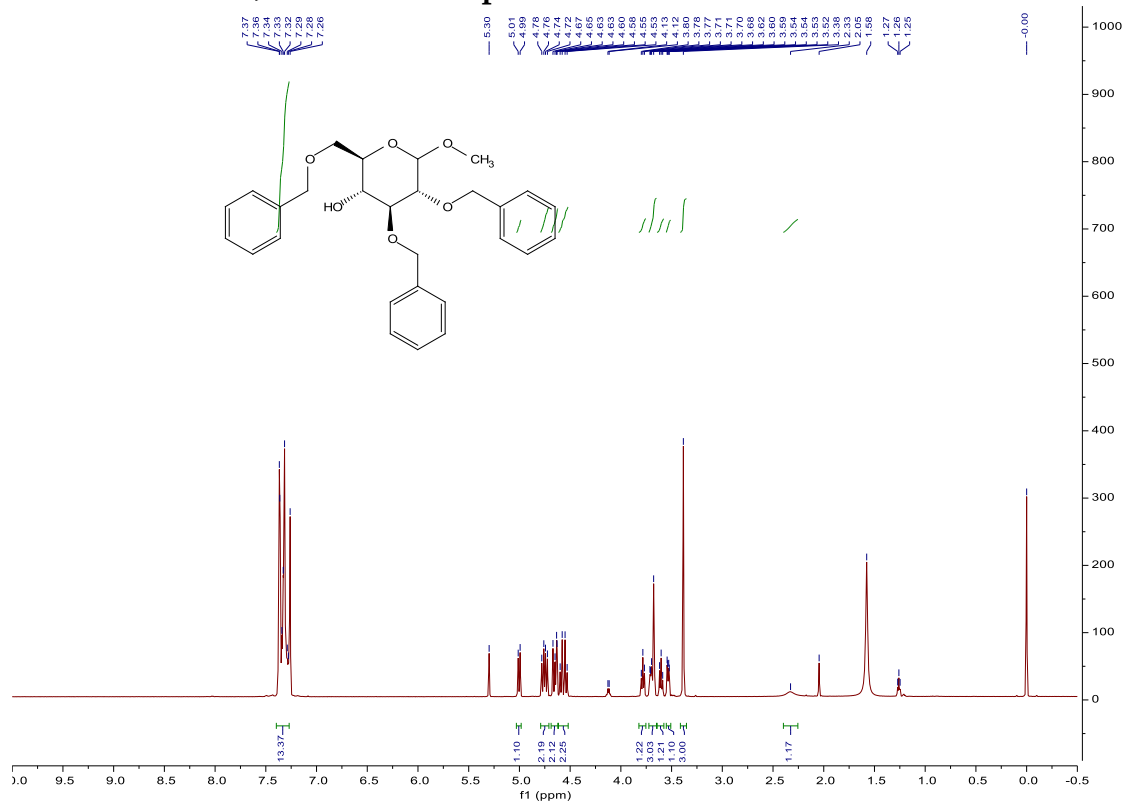

**$^{13}\text{C-NMR}$  (150MHz,  $\text{CDCl}_3$ ) of compound 15**

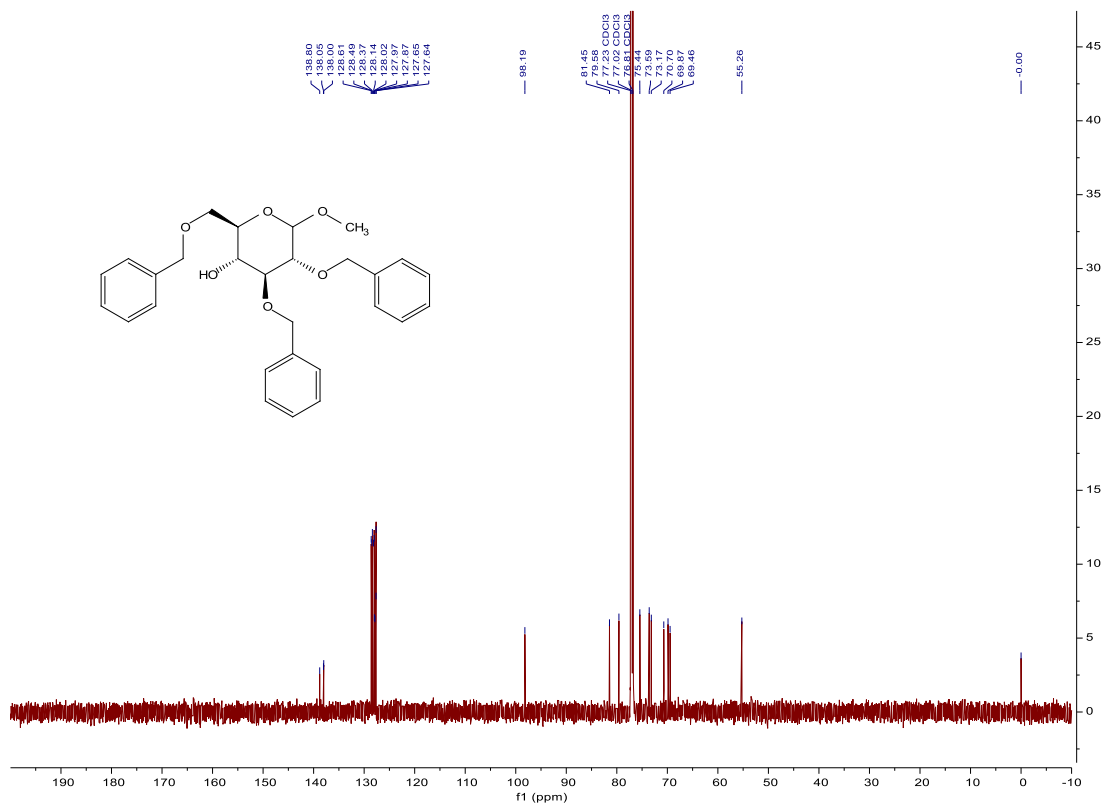

# $^1\text{H-NMR}$ (600MHz, $\text{CDCl}_3$ ) of compound 16

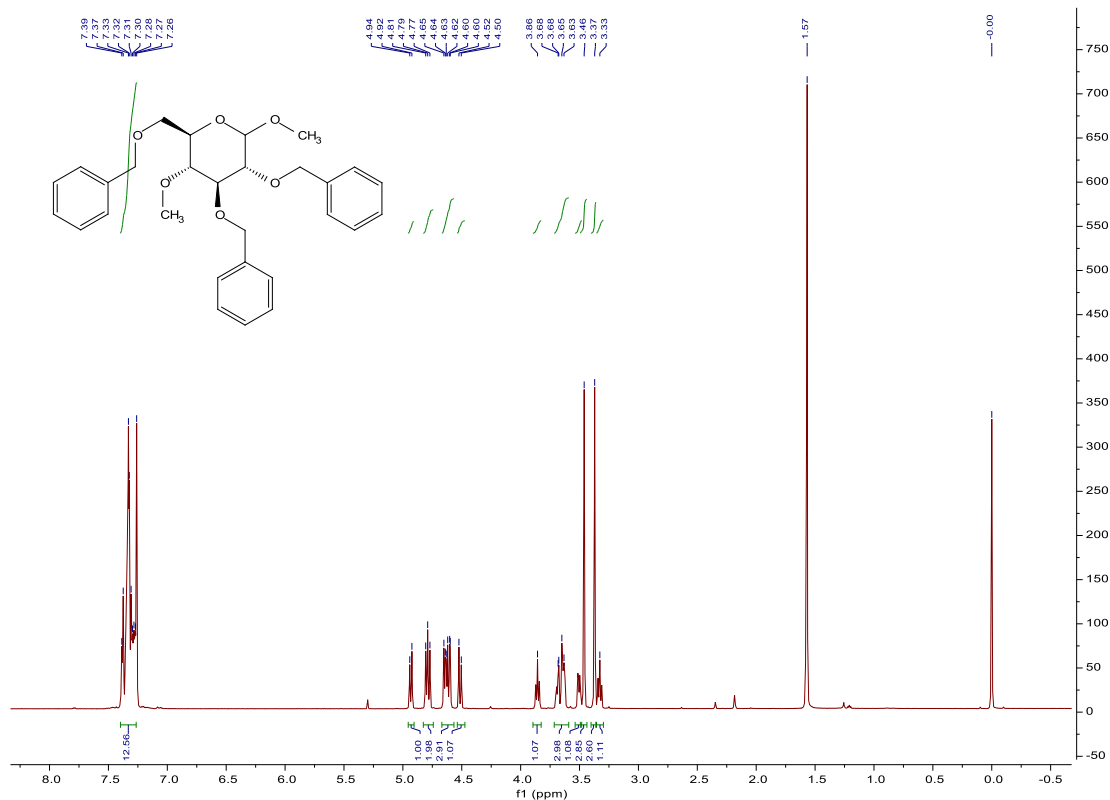

# $^{13}\text{C-NMR}$ (150MHz, $\text{CDCl}_3$ ) of compound 16

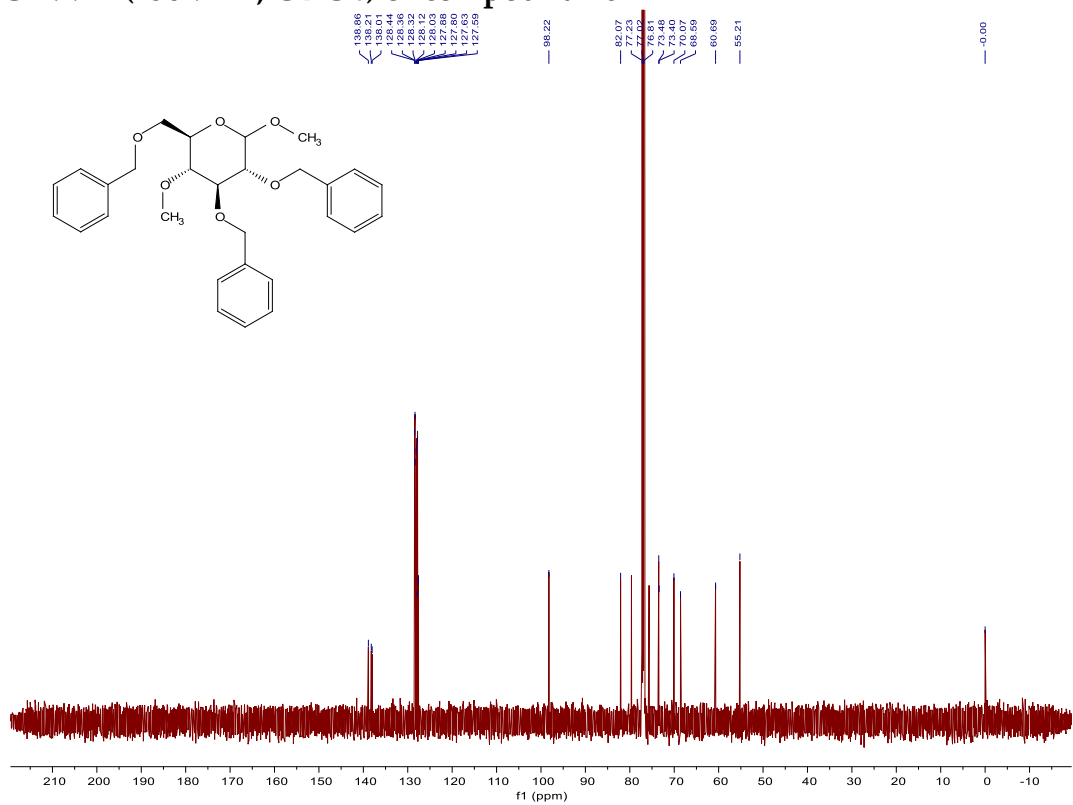

**$^1\text{H}$ -NMR (600 MHz,  $\text{CD}_3\text{OD}-d_4$ ) of compound 17**

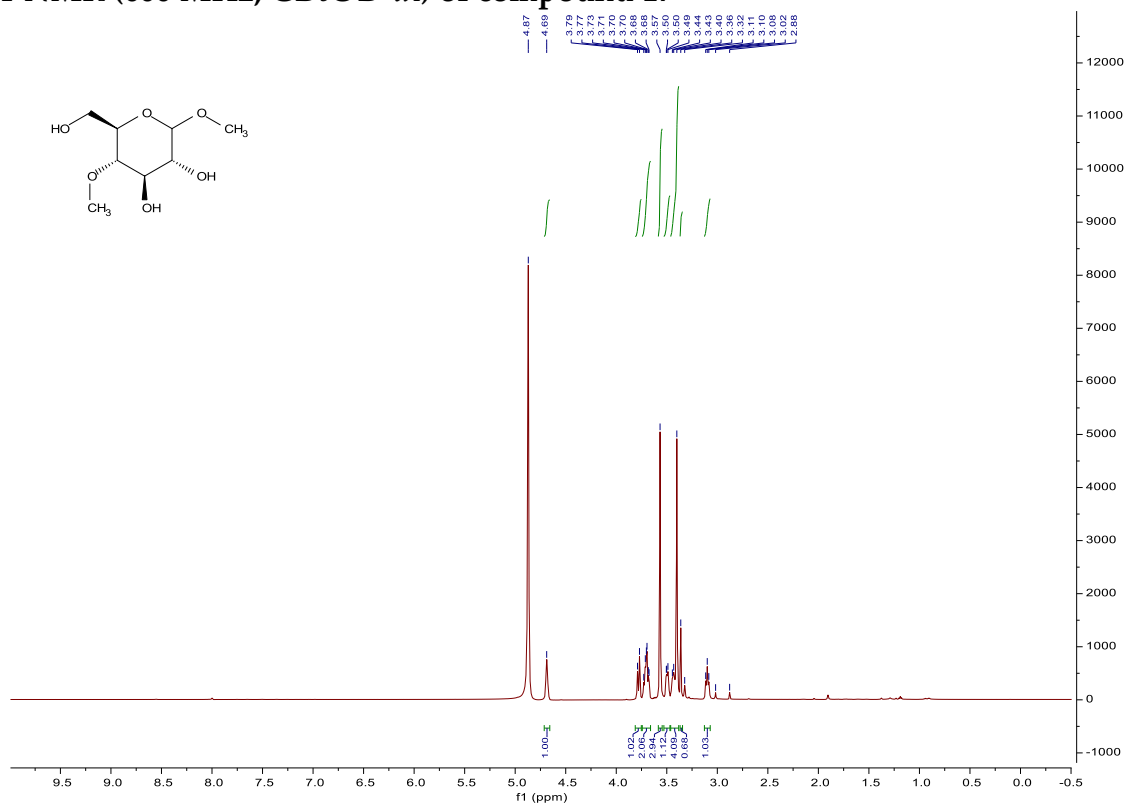

**$^1\text{H}$ -NMR (600 MHz,  $\text{CD}_3\text{OD}-d_4$ ) of compound 17**

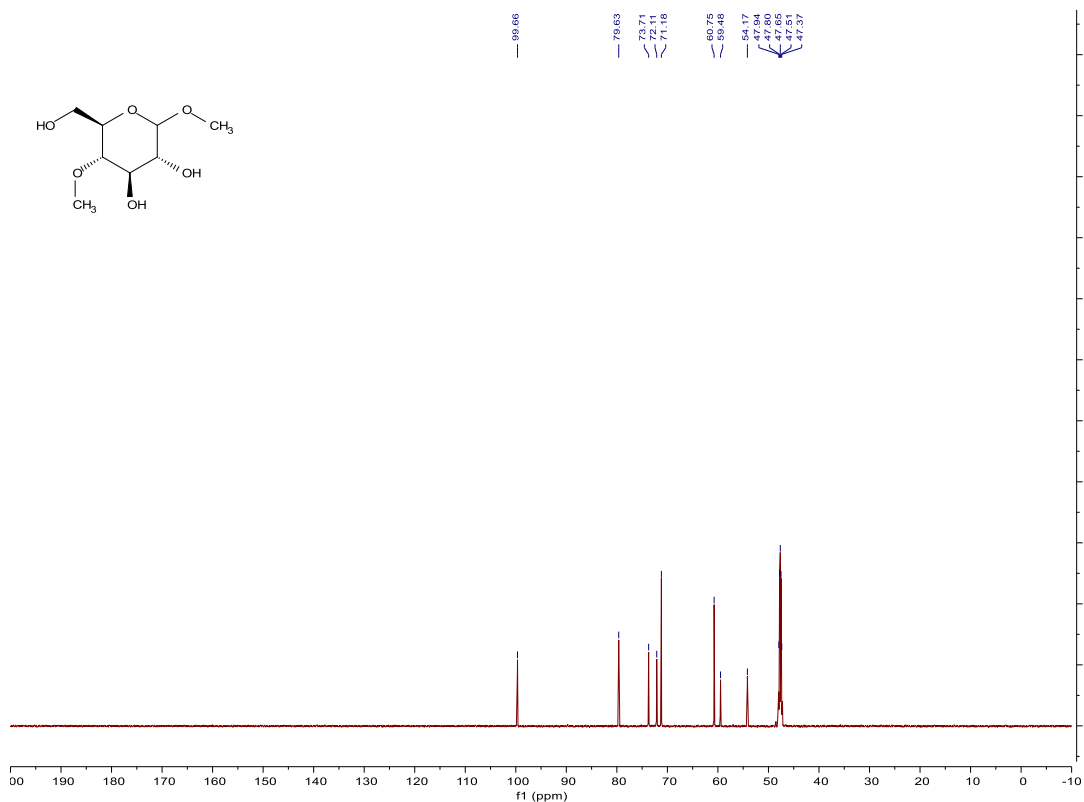

# <sup>1</sup>H-NMR (600MHz, CDCl<sub>3</sub>) of compound 18

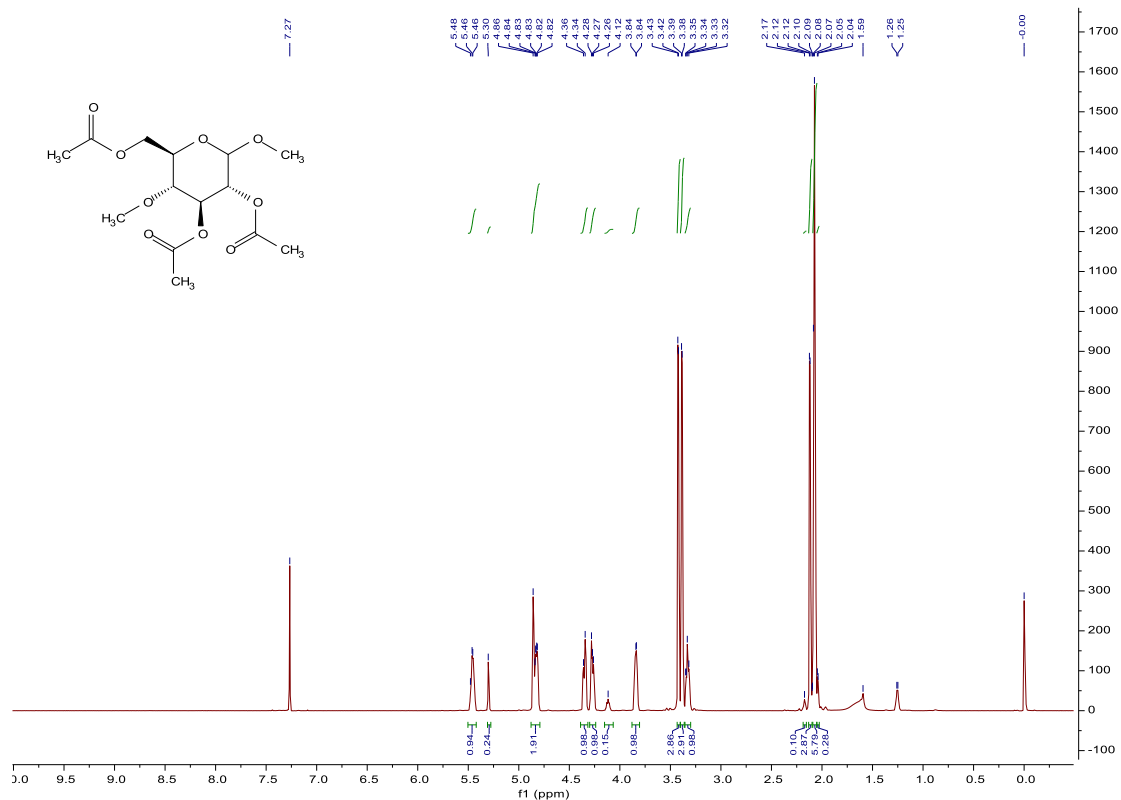

# <sup>13</sup>C-NMR (150MHz, CDCl<sub>3</sub>) of compound 18

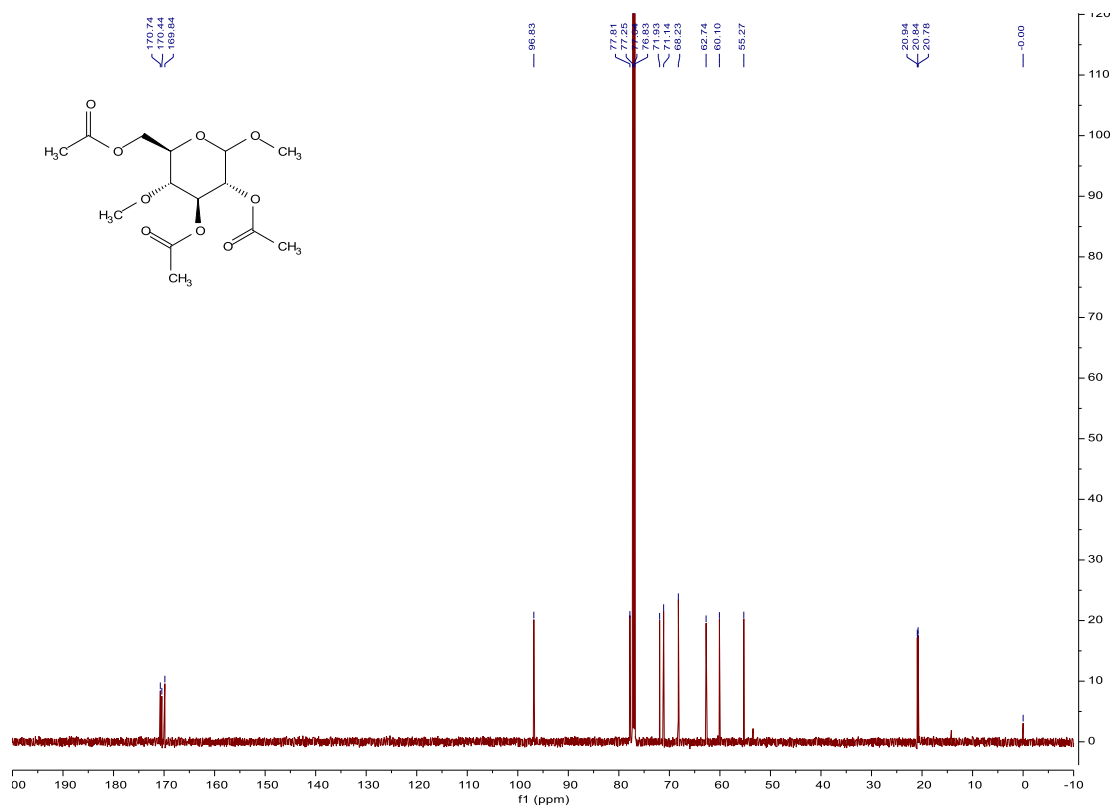

# <sup>1</sup>H-NMR (600MHz, CDCl<sub>3</sub>) of compound 19

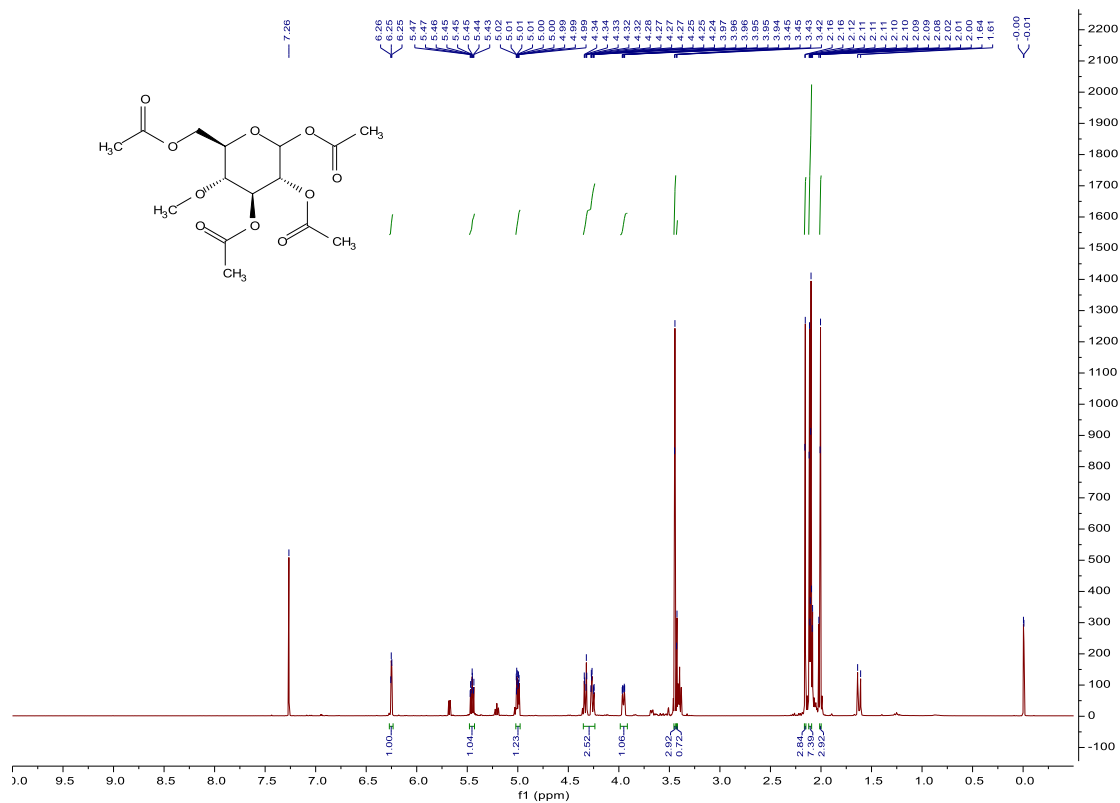

# <sup>13</sup>C-NMR (150MHz, CDCl<sub>3</sub>) of compound 19

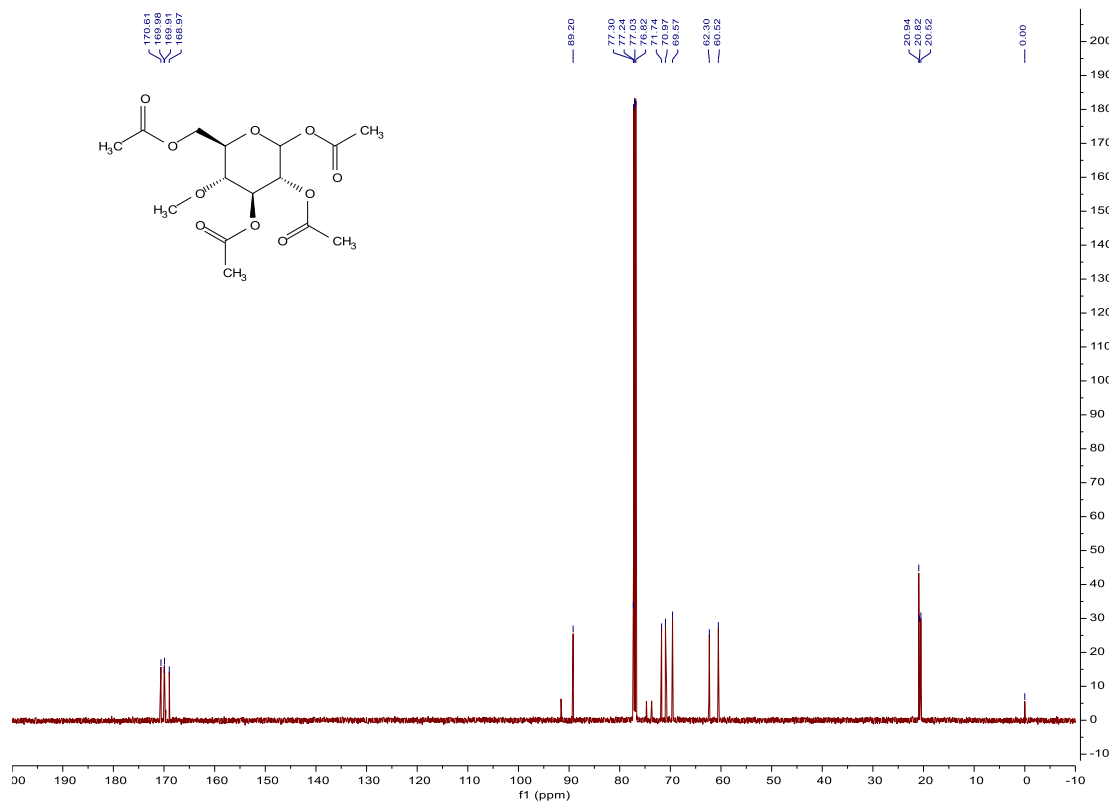



# <sup>1</sup>H-NMR (600MHz, CDCl<sub>3</sub>) of compound 6

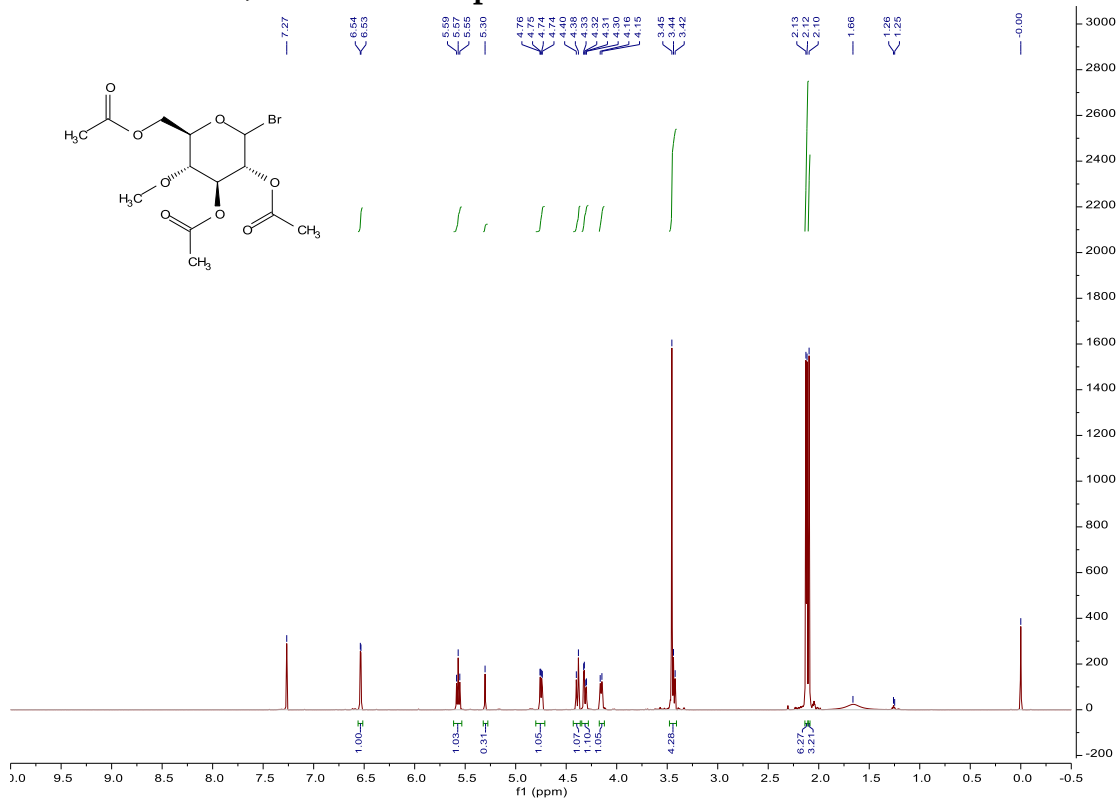

# <sup>13</sup>C-NMR (150MHz, CDCl<sub>3</sub>) of compound 6

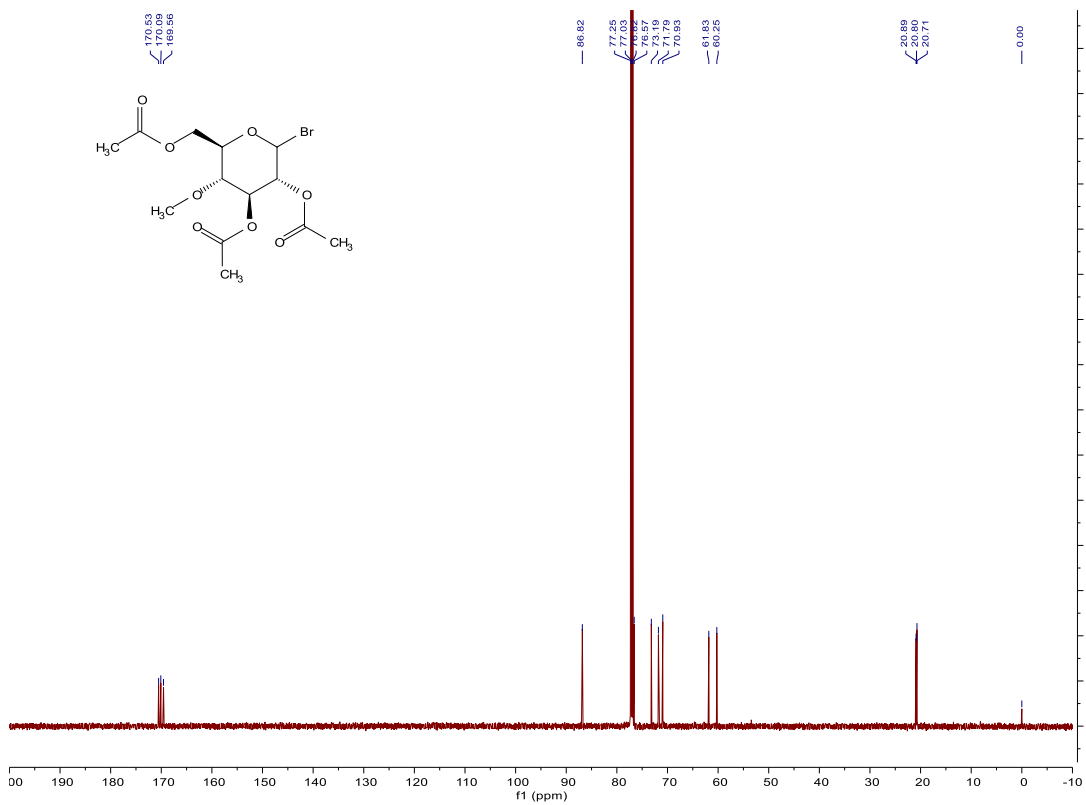

# <sup>1</sup>H-NMR (600MHz, CDCl<sub>3</sub>) of compound 20

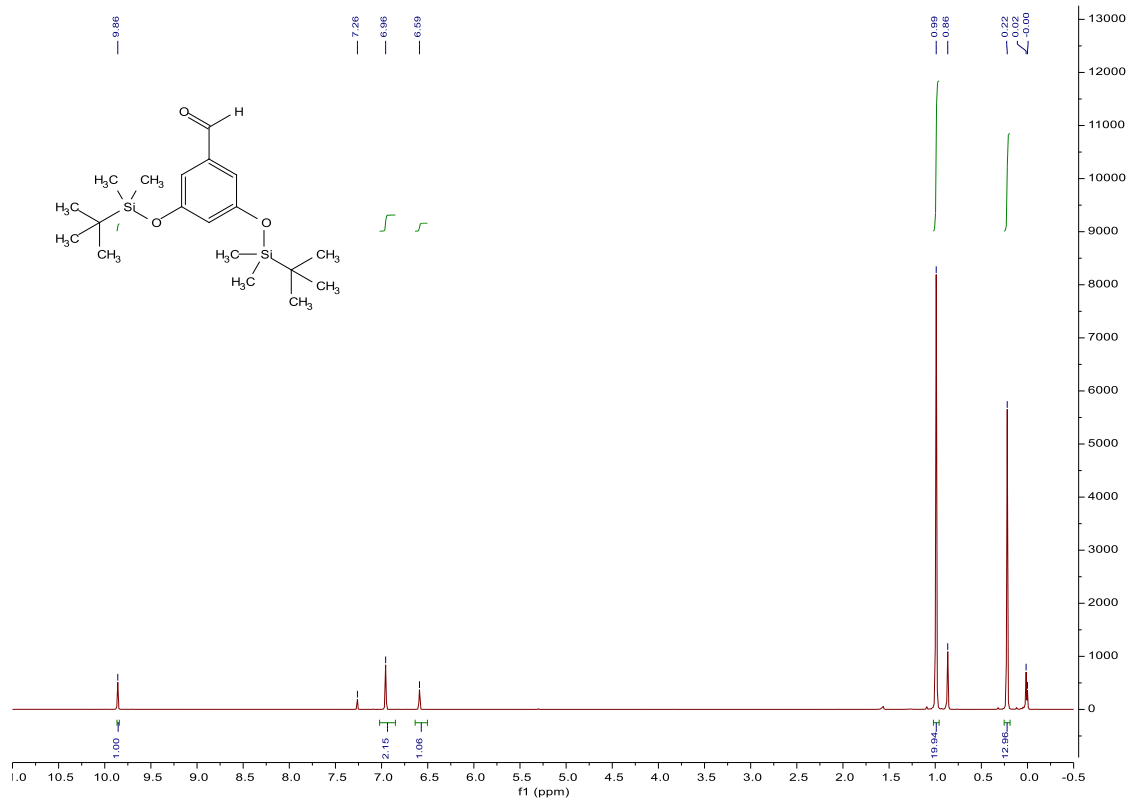

# <sup>13</sup>C-NMR (150 MHz, CDCl<sub>3</sub>) of compound 20

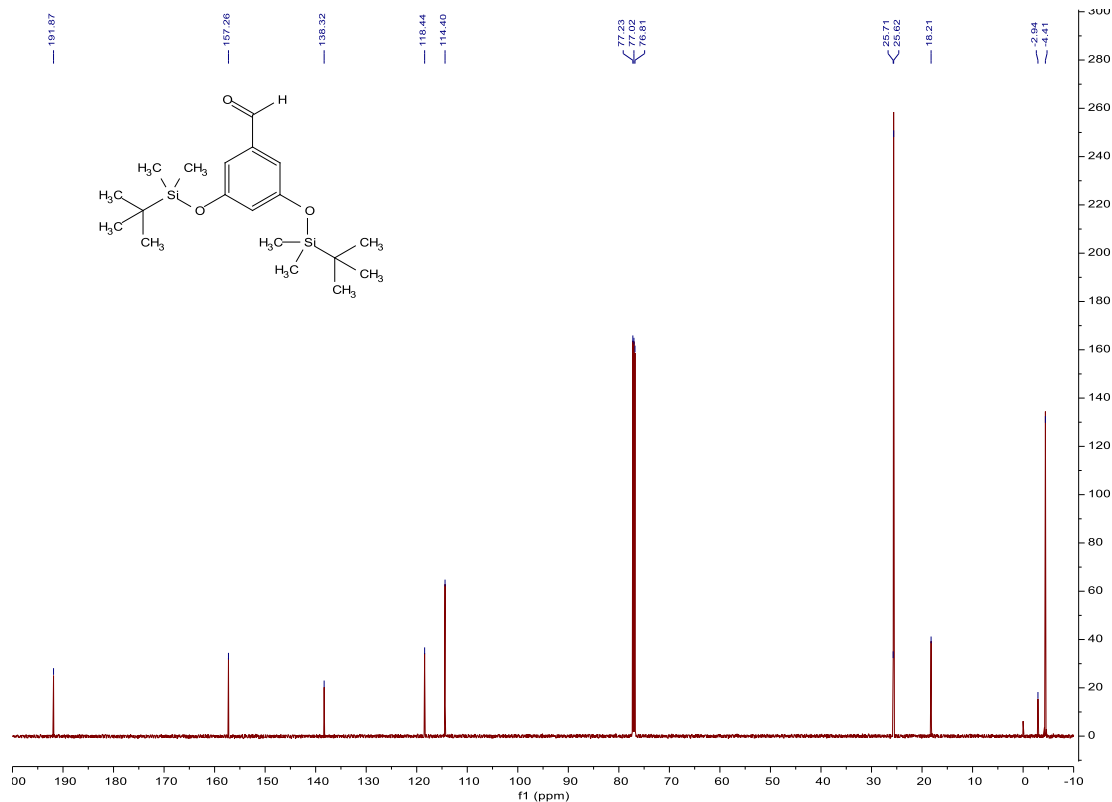

# <sup>1</sup>H-NMR (600MHz, CDCl<sub>3</sub>) of compound 21

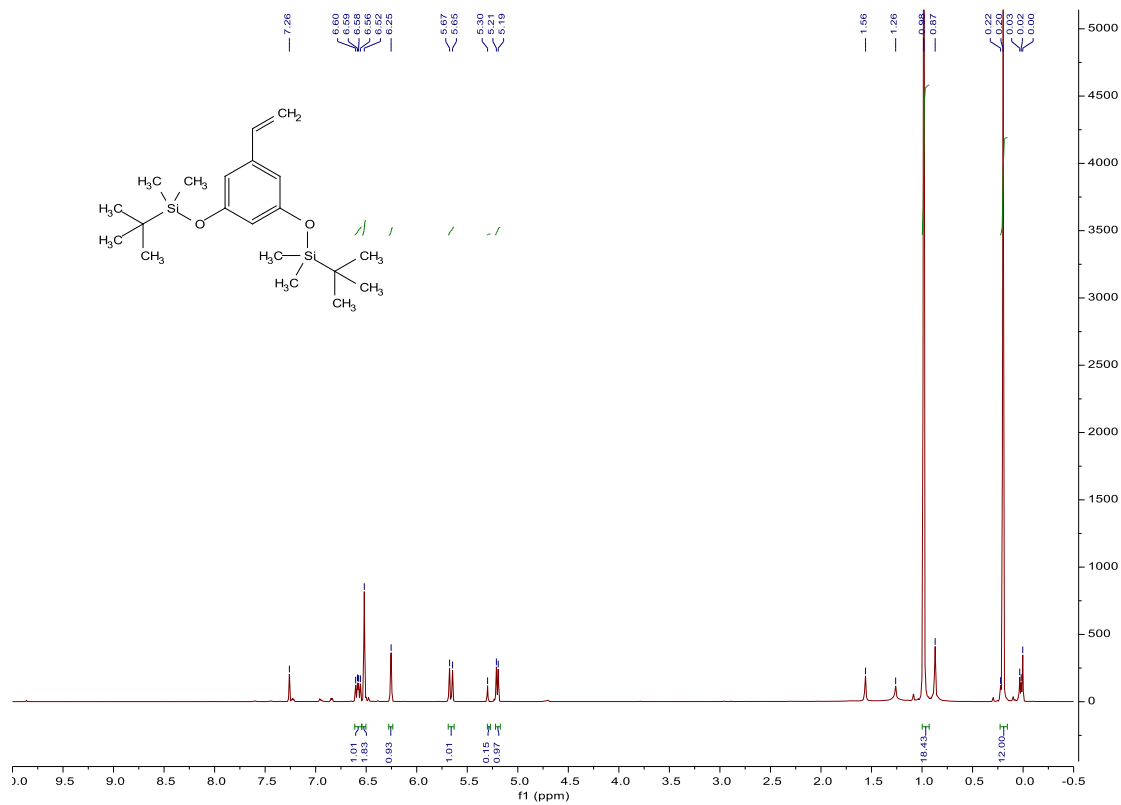

# <sup>13</sup>C-NMR (150MHz, CDCl<sub>3</sub>) of compound 21

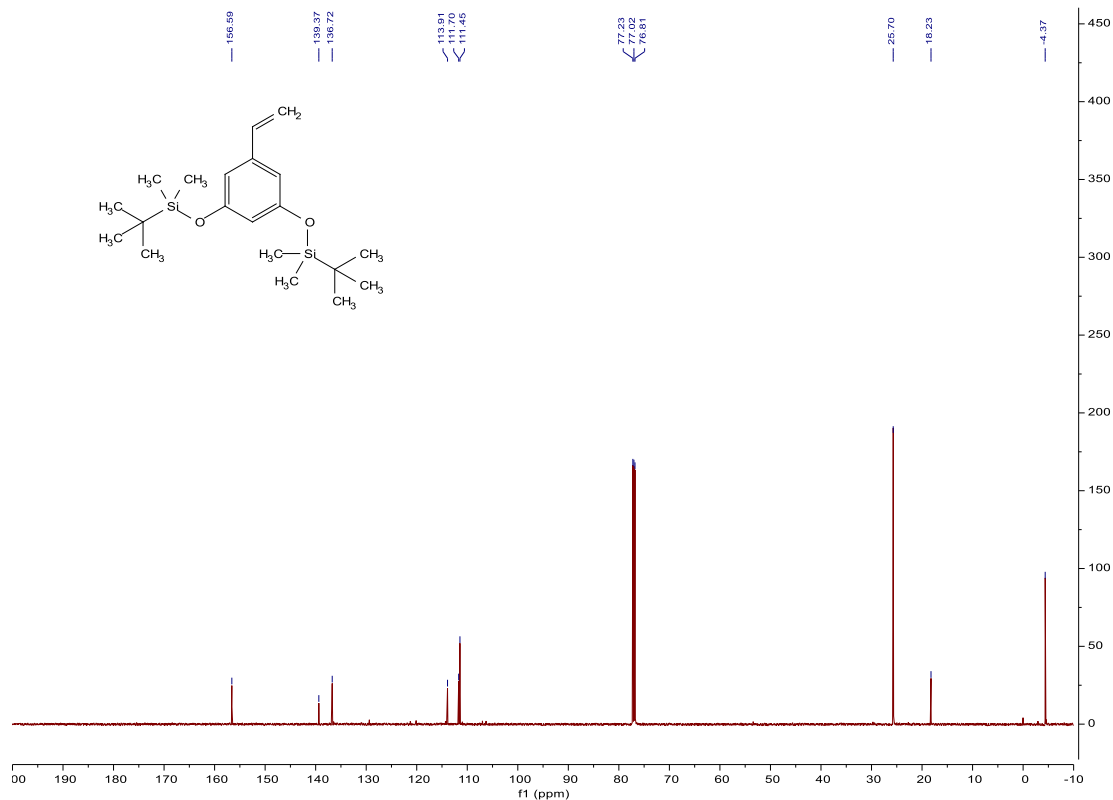

# <sup>1</sup>H-NMR (600MHz, CD<sub>3</sub>OD-*d*<sub>4</sub>) of compound 12

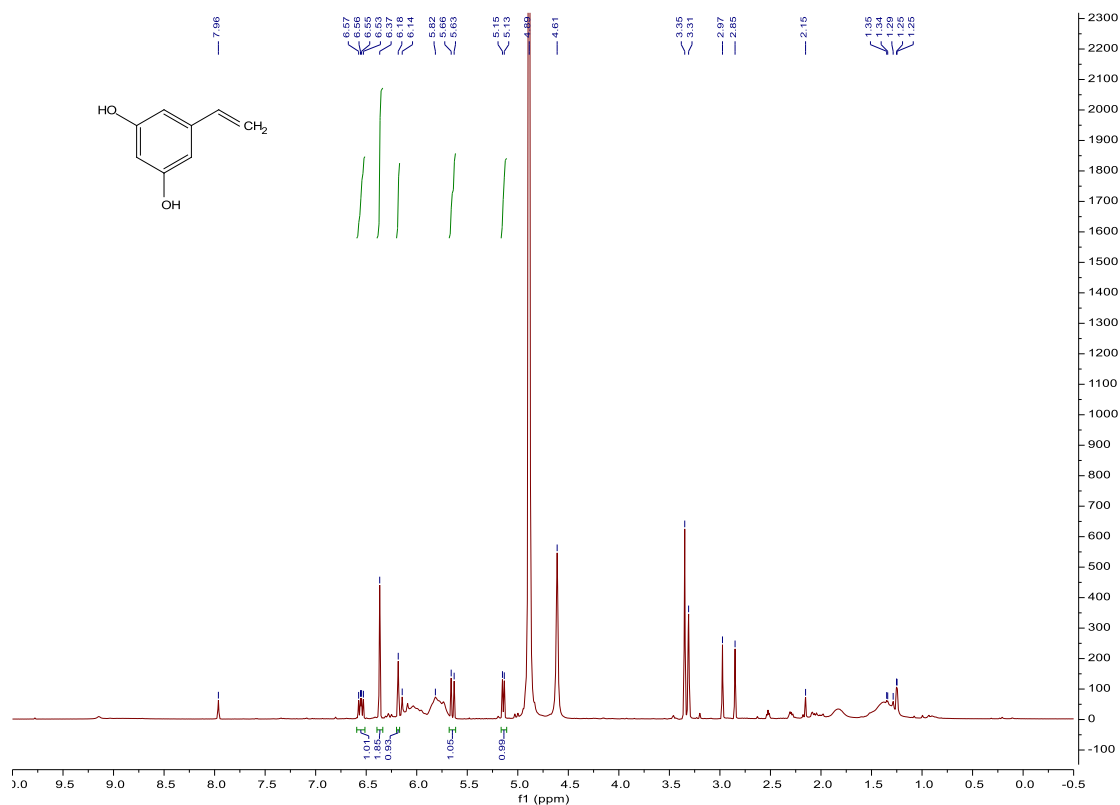

# <sup>13</sup>C-NMR (150MHz, CD<sub>3</sub>OD-*d*<sub>4</sub>) of compound 12

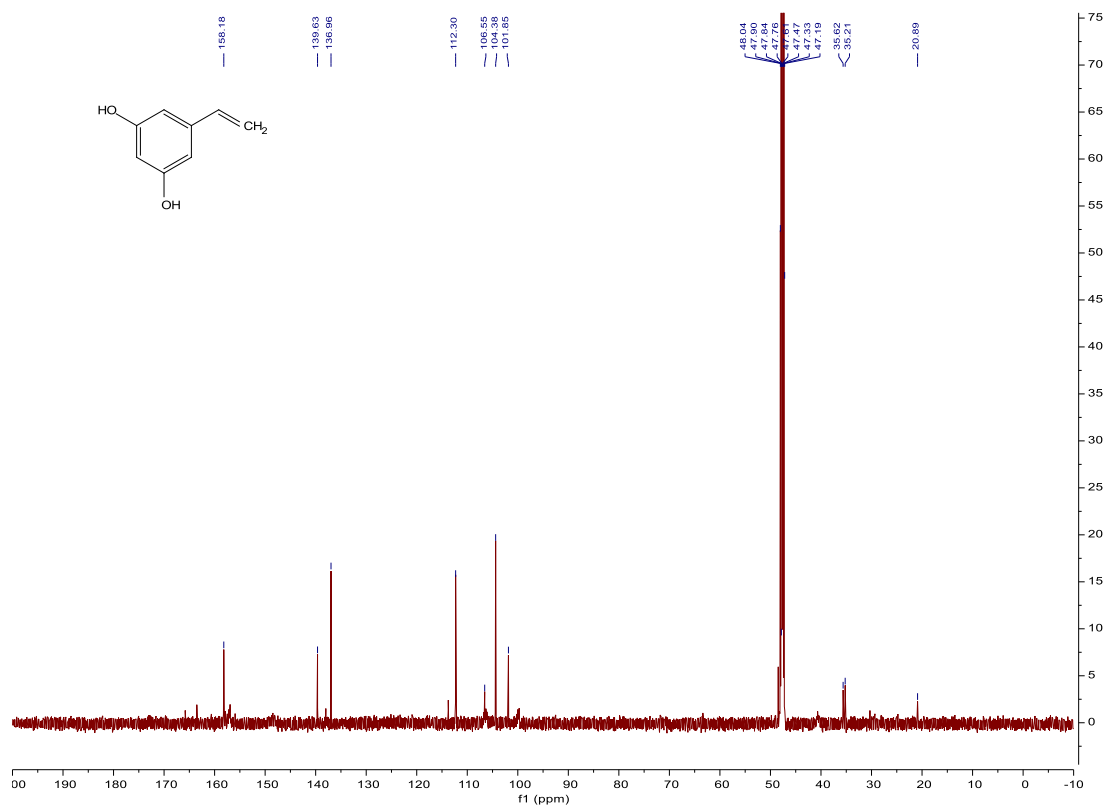

# <sup>1</sup>H-NMR (600MHz, CDCl<sub>3</sub>) of compound 5

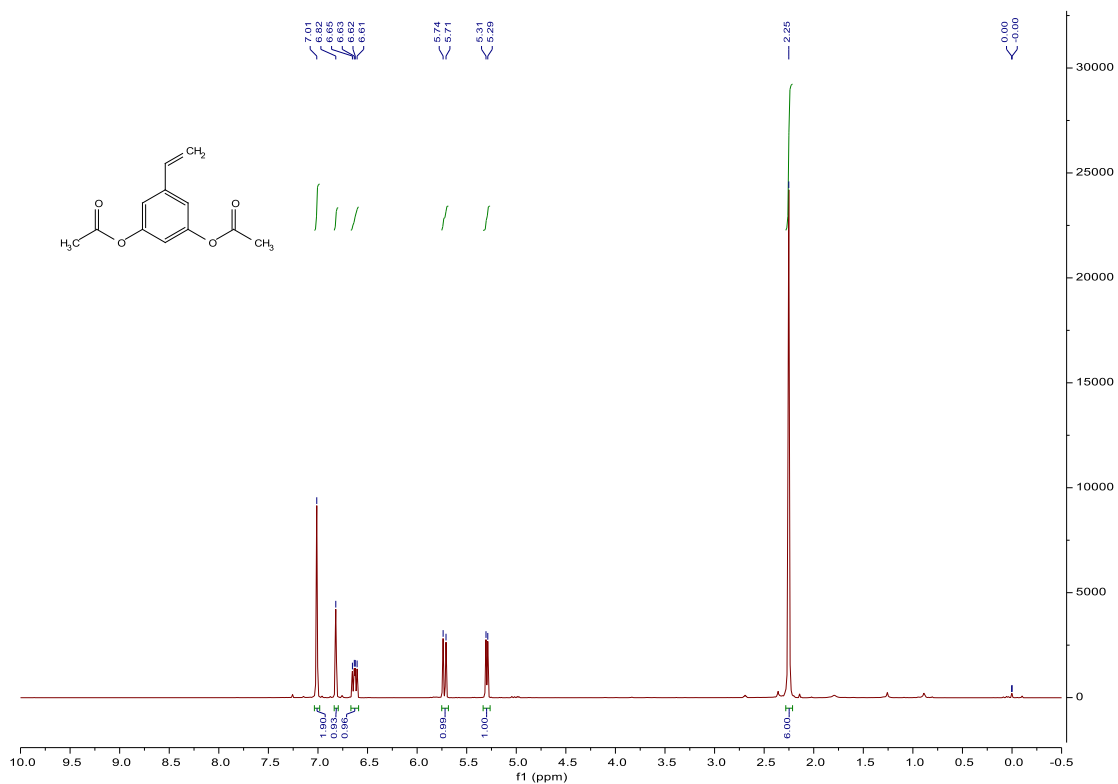

# <sup>13</sup>C-NMR (150MHz, CDCl<sub>3</sub>) of compound 5

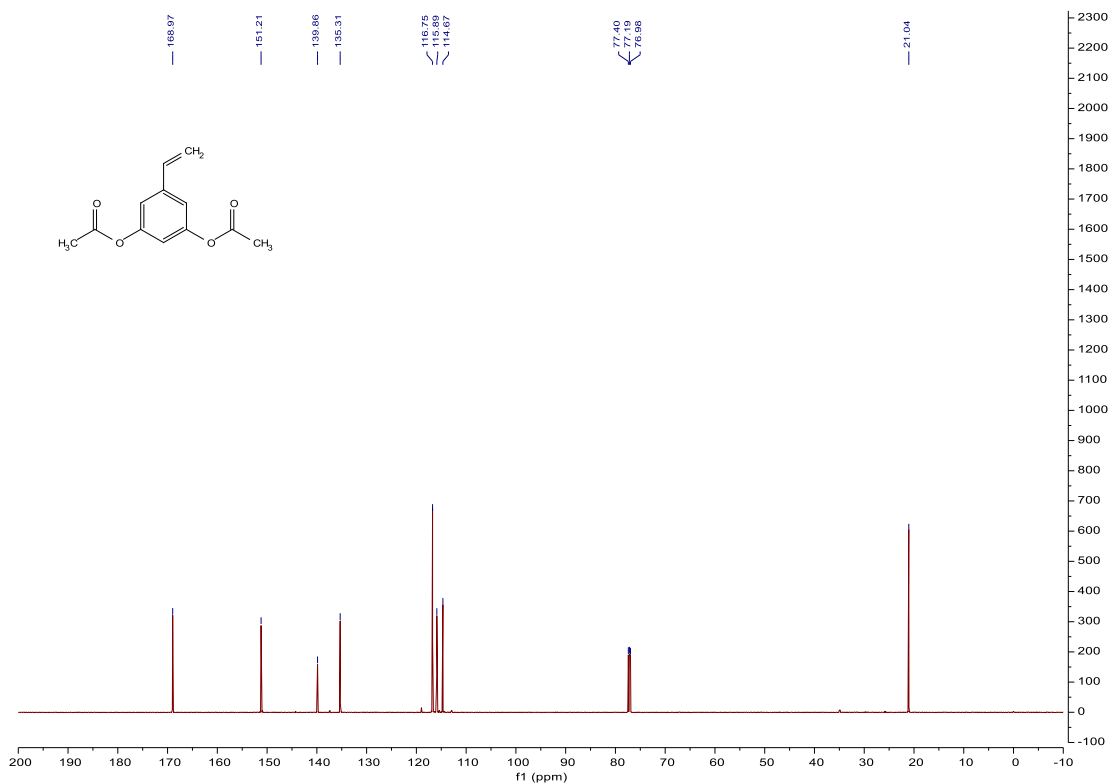

### $^1\text{H}$ -NMR (600MHz, $\text{CDCl}_3$ ) of compound 11

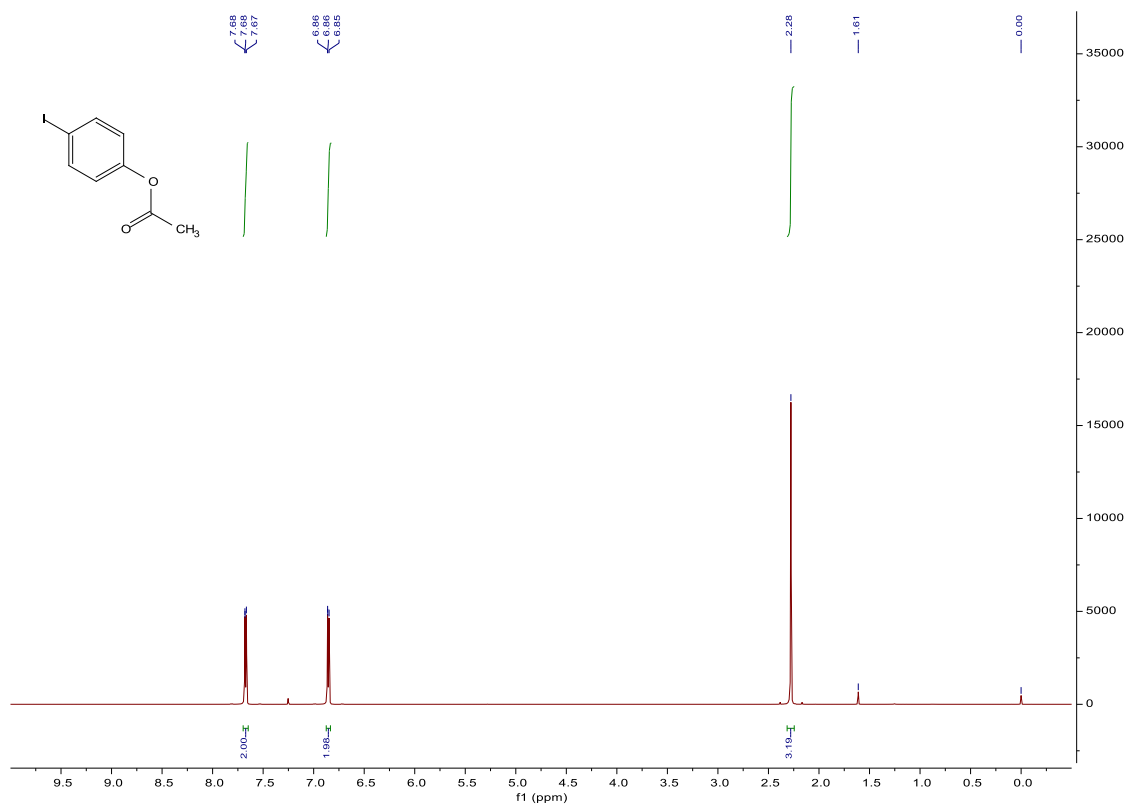

### $^{13}\text{C}$ -NMR (150MHz, $\text{CDCl}_3$ ) of compound 11

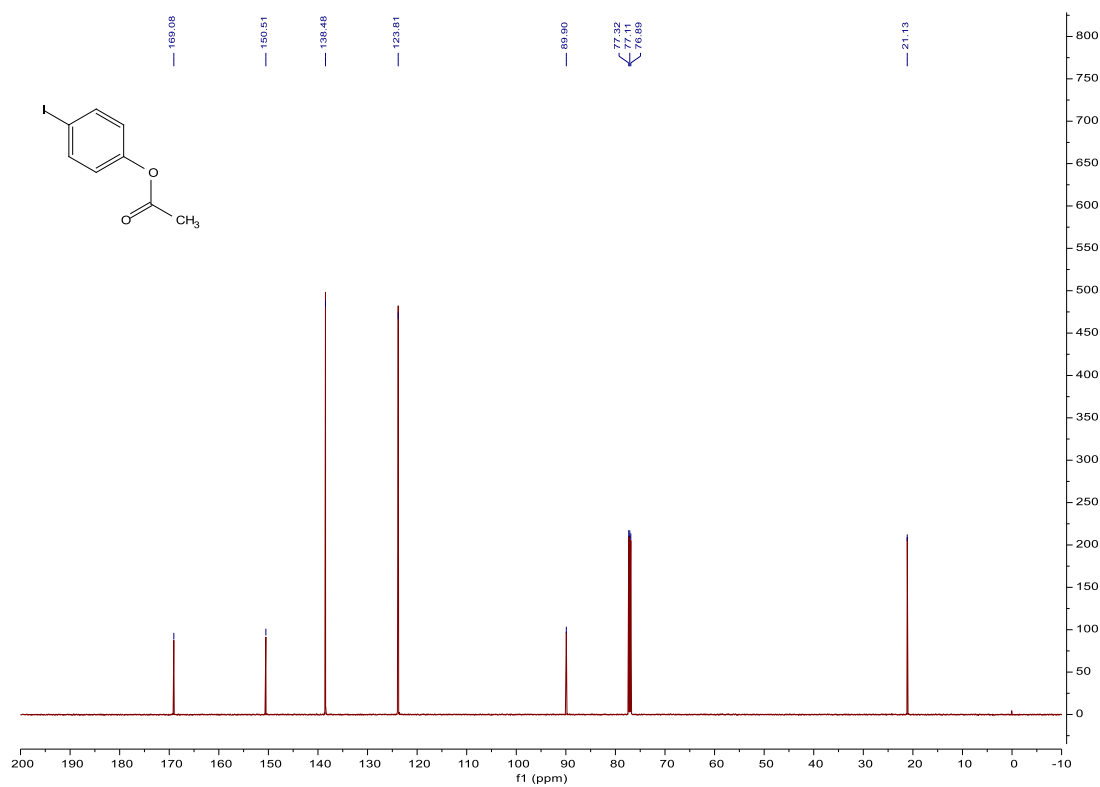

# <sup>1</sup>H-NMR (600MHz, CDCl<sub>3</sub>) of compound 4

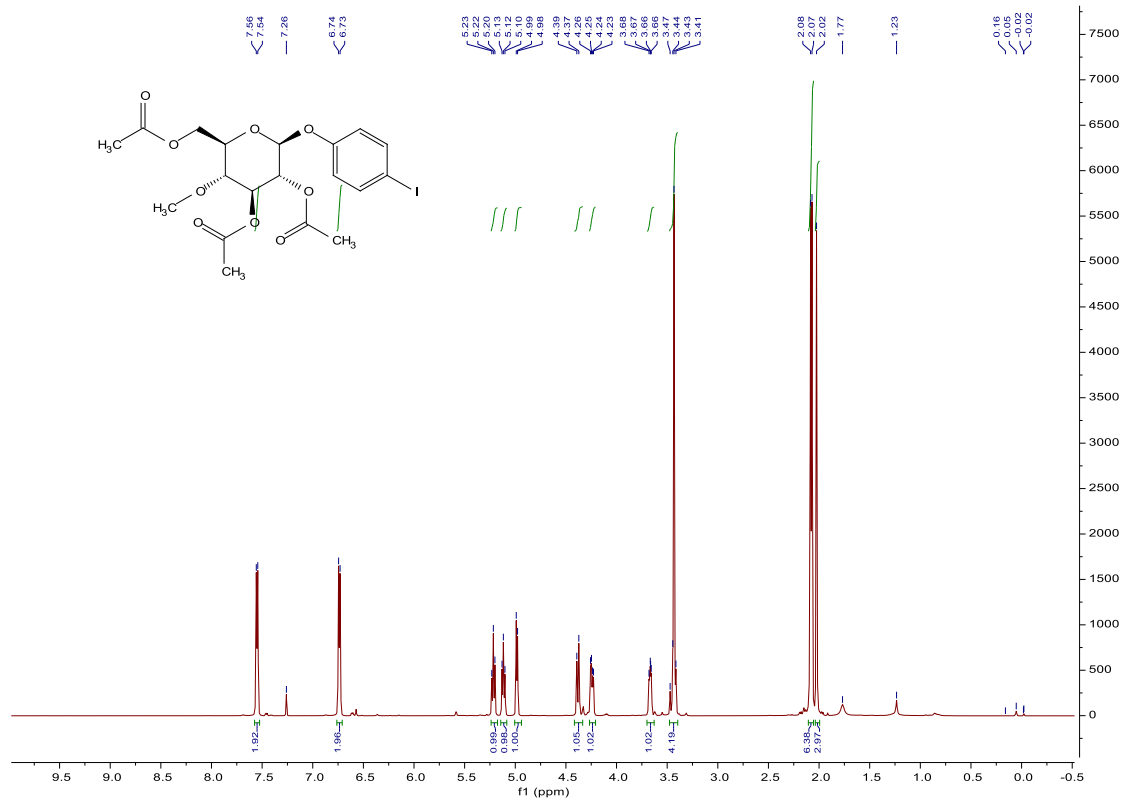

# <sup>13</sup>C-NMR (150MHz, CDCl<sub>3</sub>) of compound 4

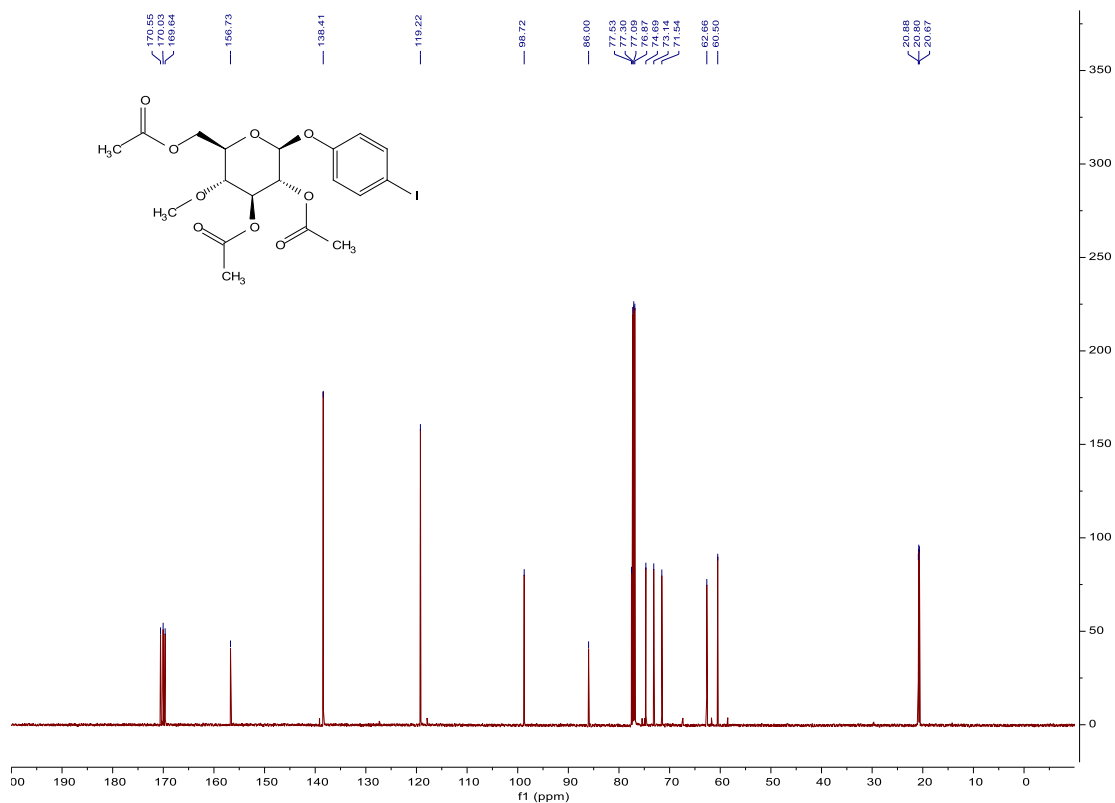

# <sup>1</sup>H-NMR (600MHz, CDCl<sub>3</sub>) of compound 22

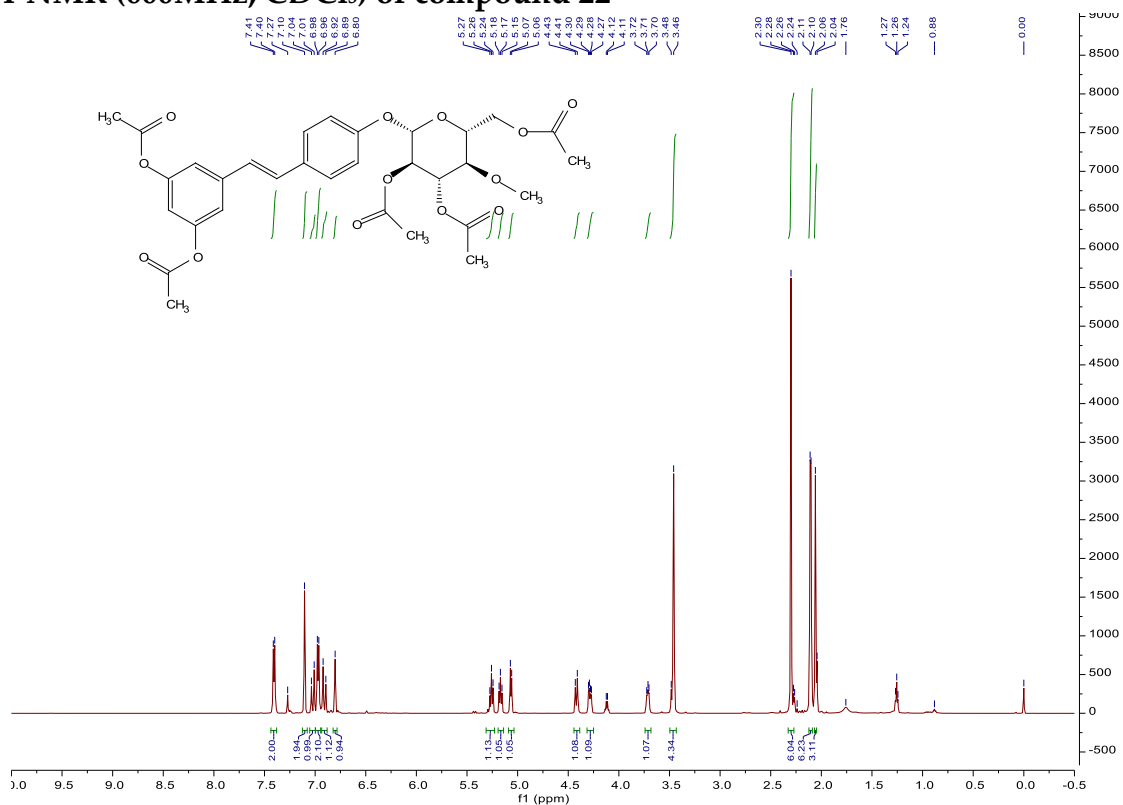

# <sup>13</sup>C-NMR (150 MHz, CDCl<sub>3</sub>) of compound 22



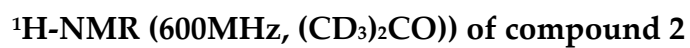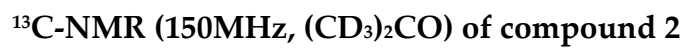

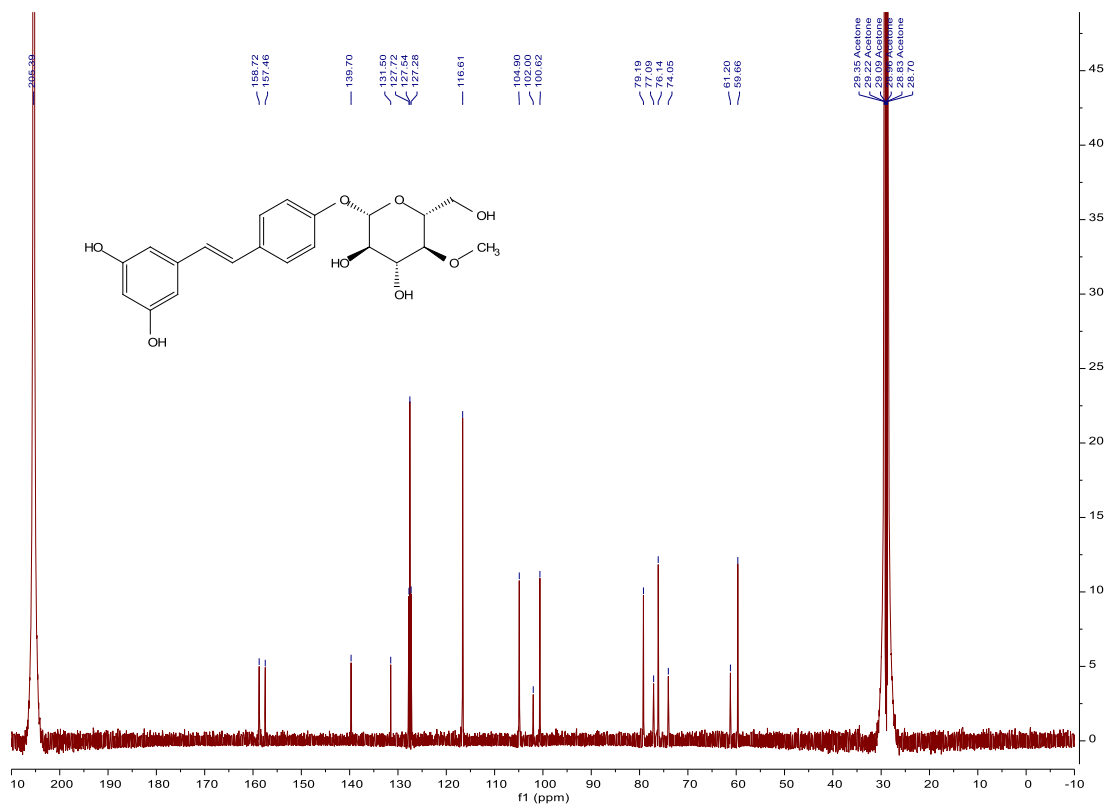

<sup>1</sup>H-NMR (600MHz, CDCl<sub>3</sub>) of compound 10

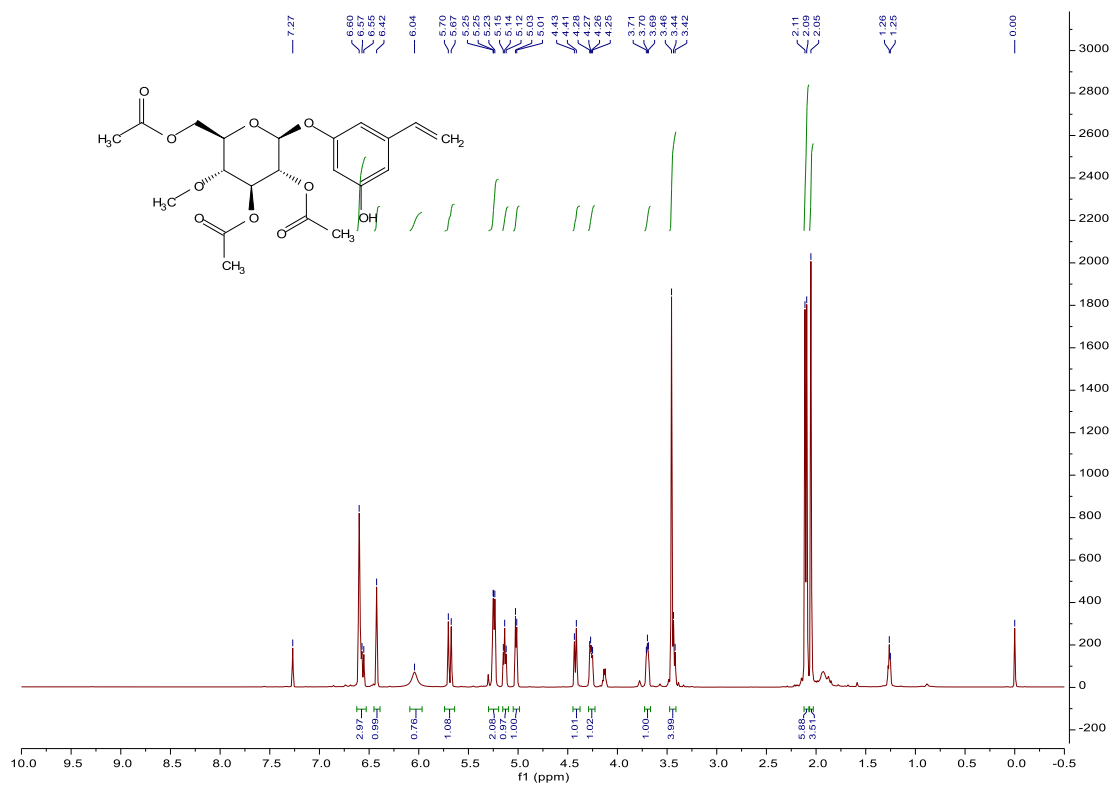

<sup>13</sup>C-NMR (150MHz, CDCl<sub>3</sub>) of compound 10

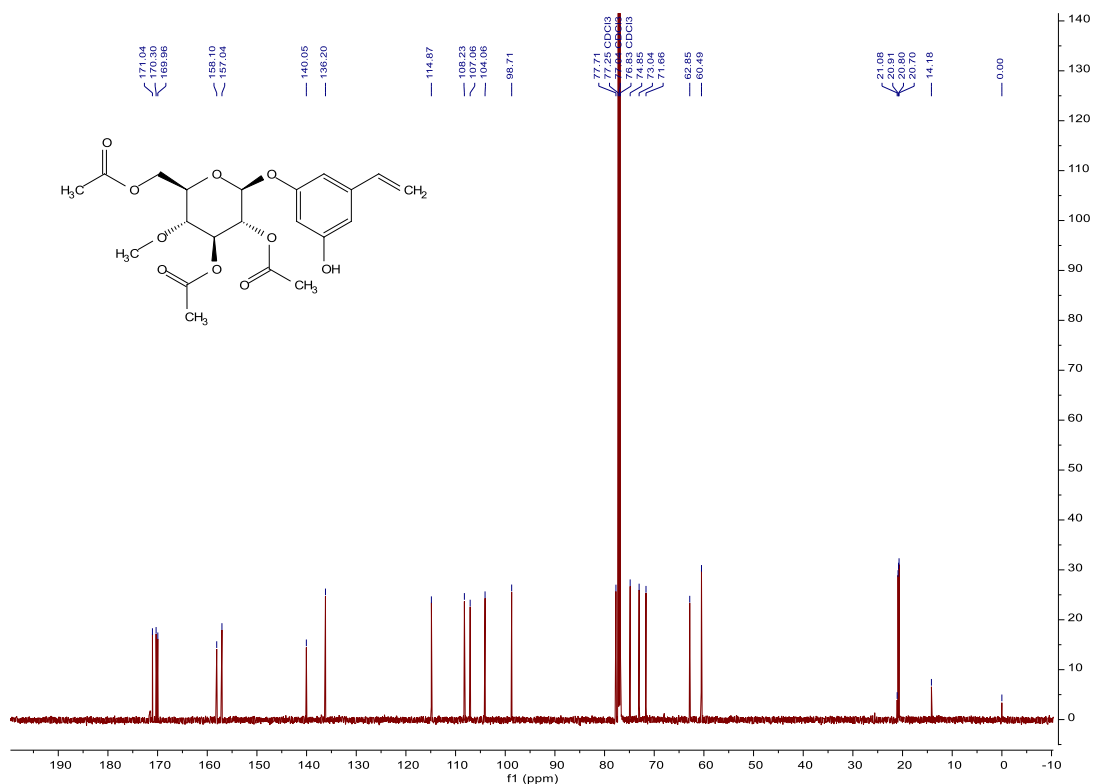

### <sup>1</sup>H-NMR (600 MHz, CDCl<sub>3</sub>) of Compound 23

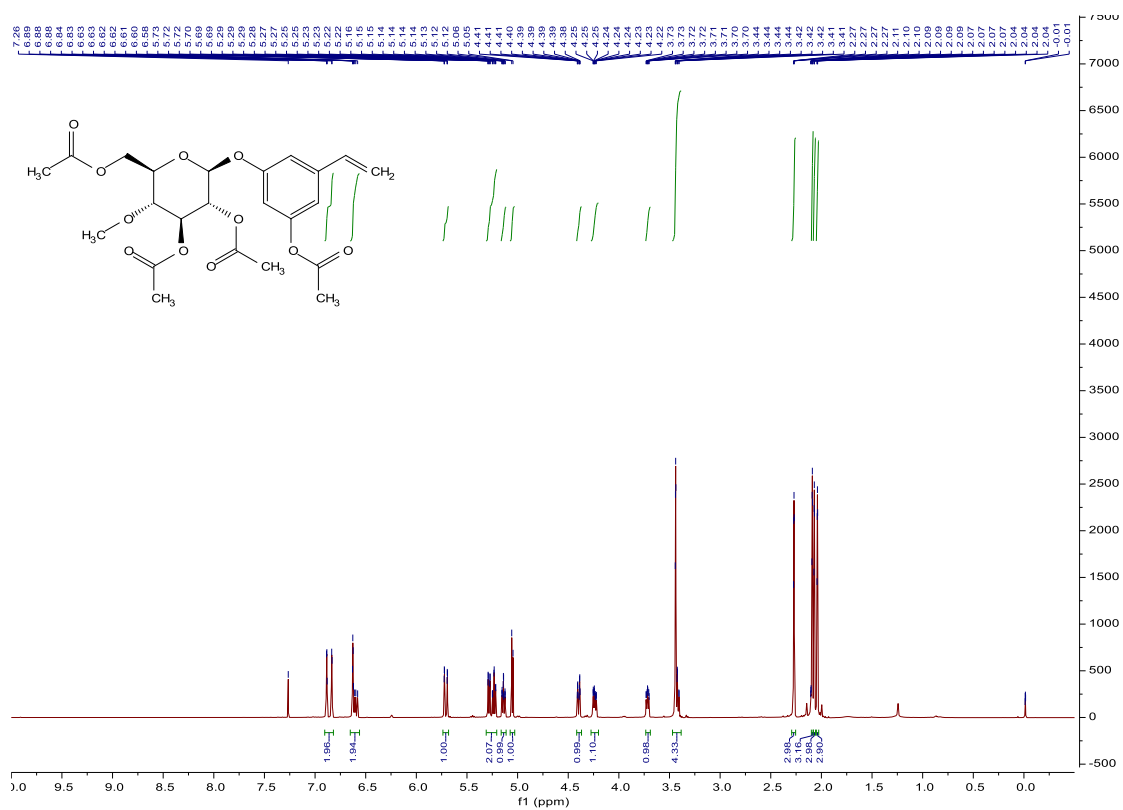

### <sup>13</sup>C-NMR (151 MHz, CDCl<sub>3</sub>) of Compound 23

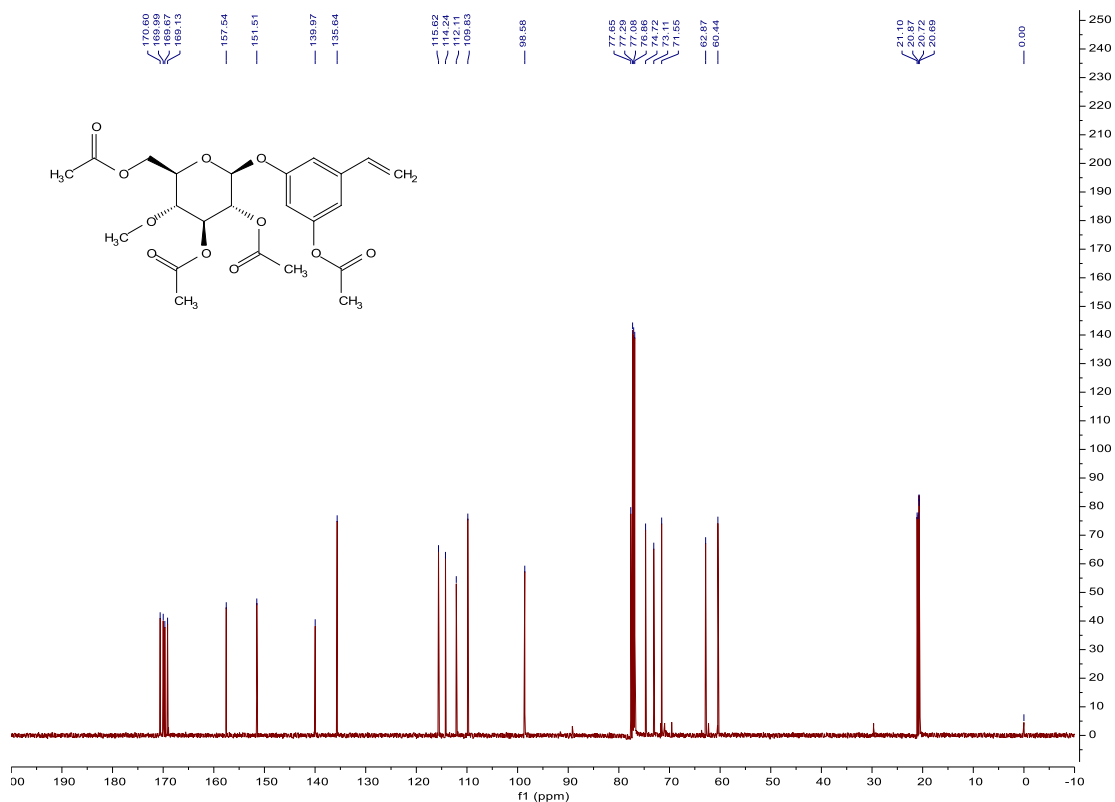

### <sup>1</sup>H-NMR (600MHz, CDCl<sub>3</sub>) of compound 24

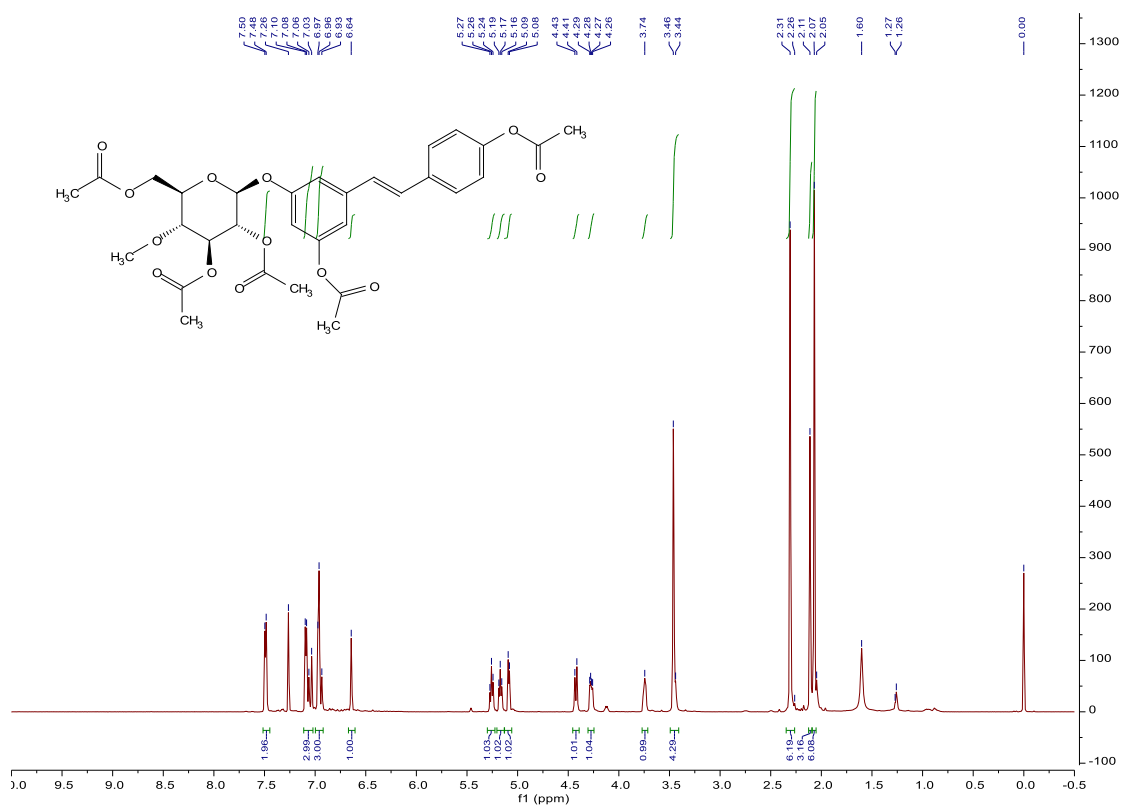

### <sup>13</sup>C-NMR (150 MHz, CDCl<sub>3</sub>) of compound 24

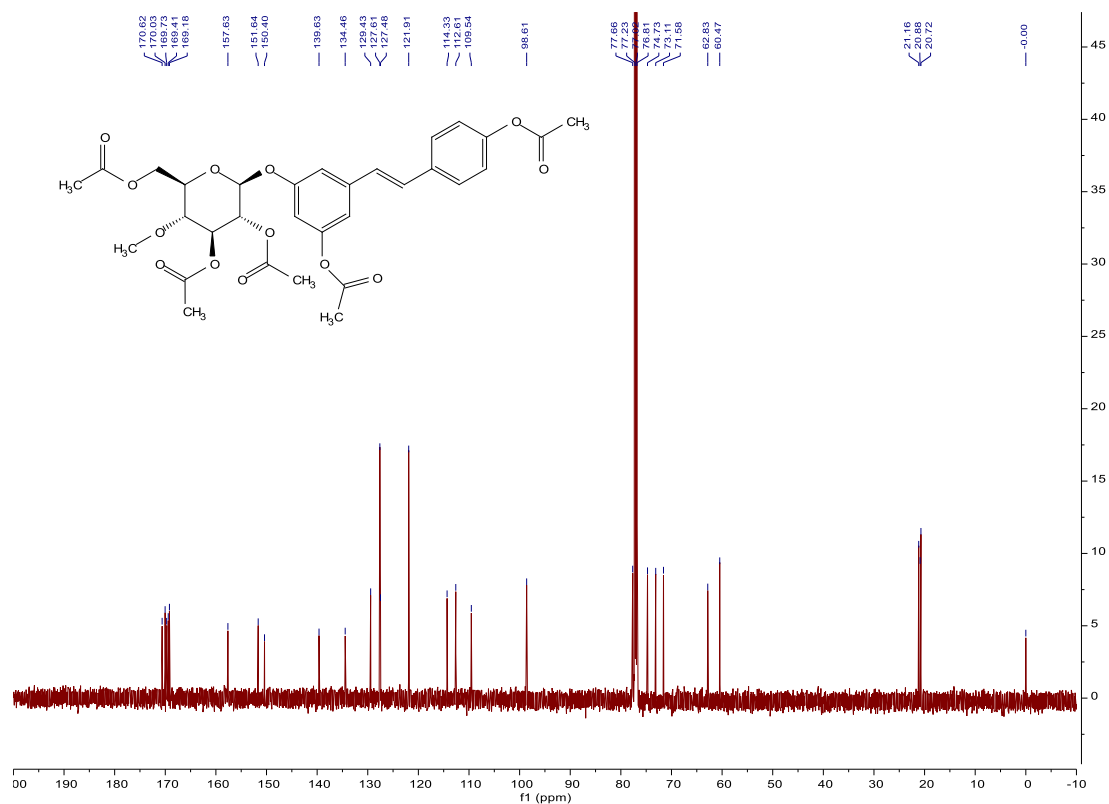

**<sup>1</sup>H-NMR (600MHz, (CD<sub>3</sub>)<sub>2</sub>CO) of compound 3**

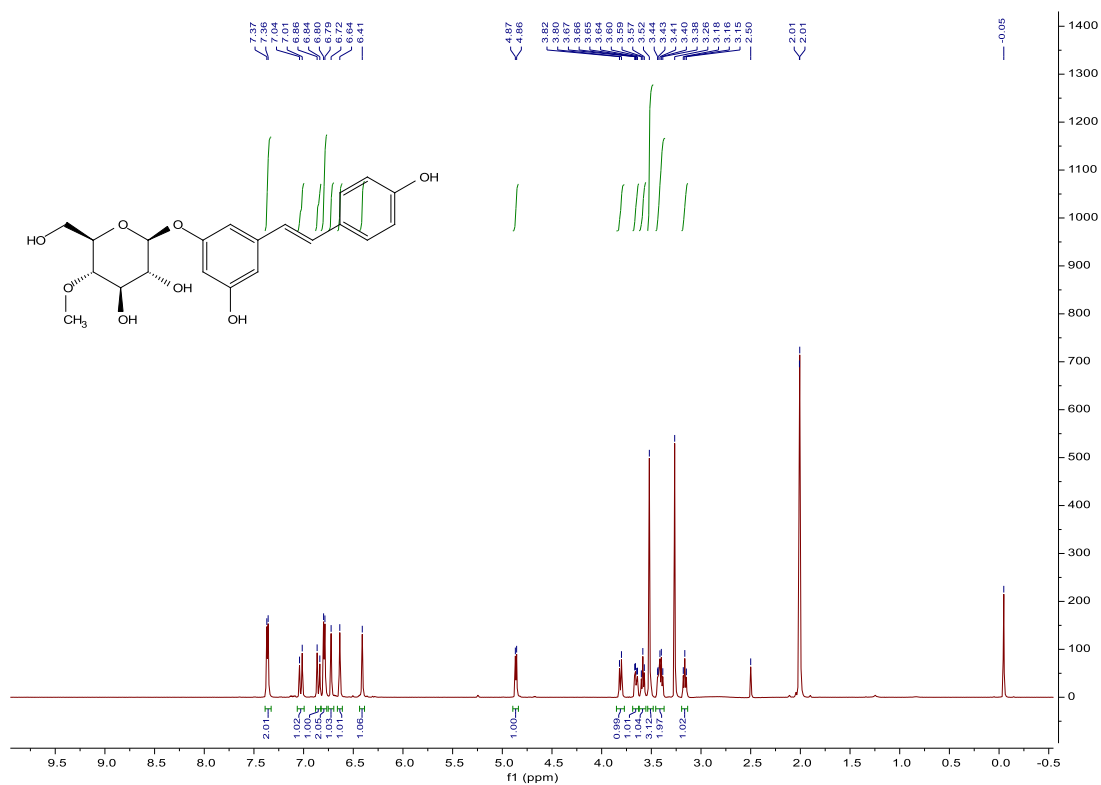

**<sup>13</sup>C-NMR (150 MHz, (CD<sub>3</sub>)<sub>2</sub>CO) of compound 3**

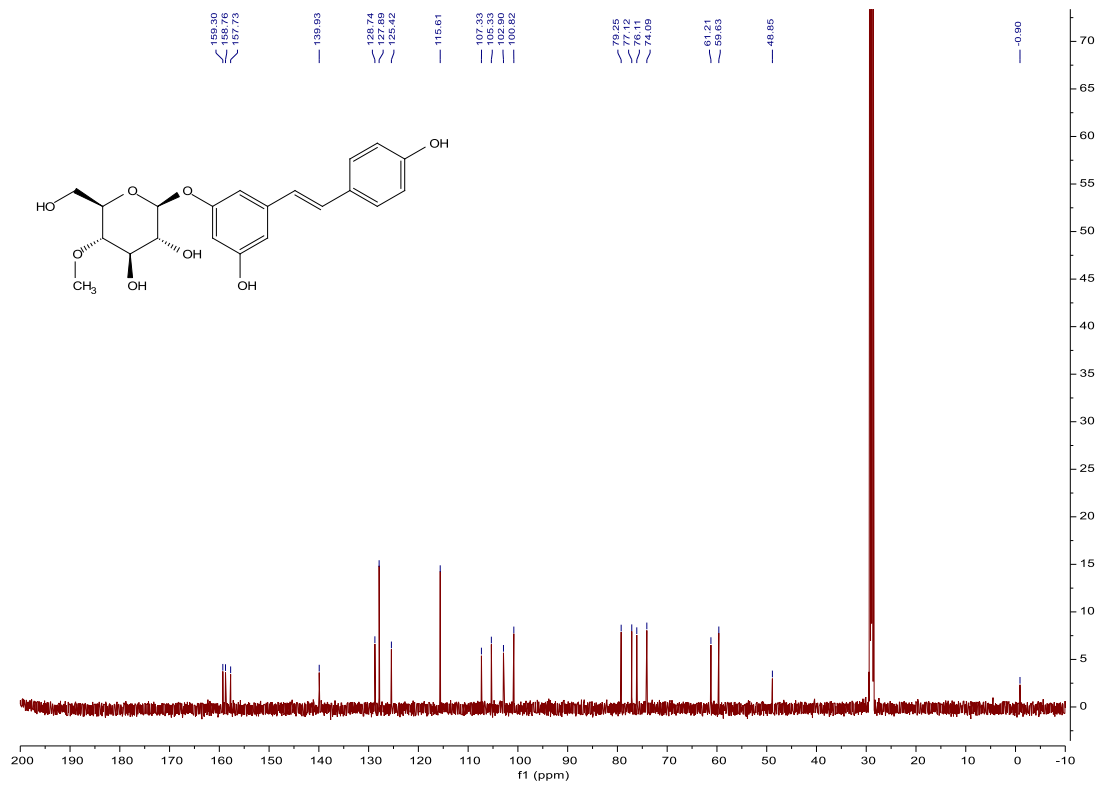

Supplement: s1 [file s1]
